# Supplementary material for: Host EPAC1 Modulates Rickettsial Adhesion to Vascular Endothelial Cells via Regulation of ANXA2 Y23 Phosphorylation
Source: MDPI journal article supplement (doi:10.3390/pathogens10101307), 2021-10-12
Supplement: s1 [file s1]

## **SUPPLEMENTAL MATERIALS**

### **Western immunoblotting**

For western immunoblotting, equal amounts of soluble protein were subjected to 10% SDS–polyacrylamide gel electrophoresis (SDS-PAGE). Proteins were transferred onto a polyvinylidene difluoride membrane and then incubated with mouse anti-ANXA2 (1:5000) (clone 5, BD Bioscience, San Jose, CA) and anti-GAPDH (1:5000) (Thermo Fisher Scientific) at 4°C overnight, followed by incubation with a secondary antibody at 1:10,000 for 2 hrs. A goat anti-mouse or rabbit IgG and IgM (H+L)-HRP (Thermo Fisher Scientific) were used as the secondary antibodies. Blots were visualized using Pierce™ ECL Western Blotting Substrate kit (Thermo Fisher Scientific).

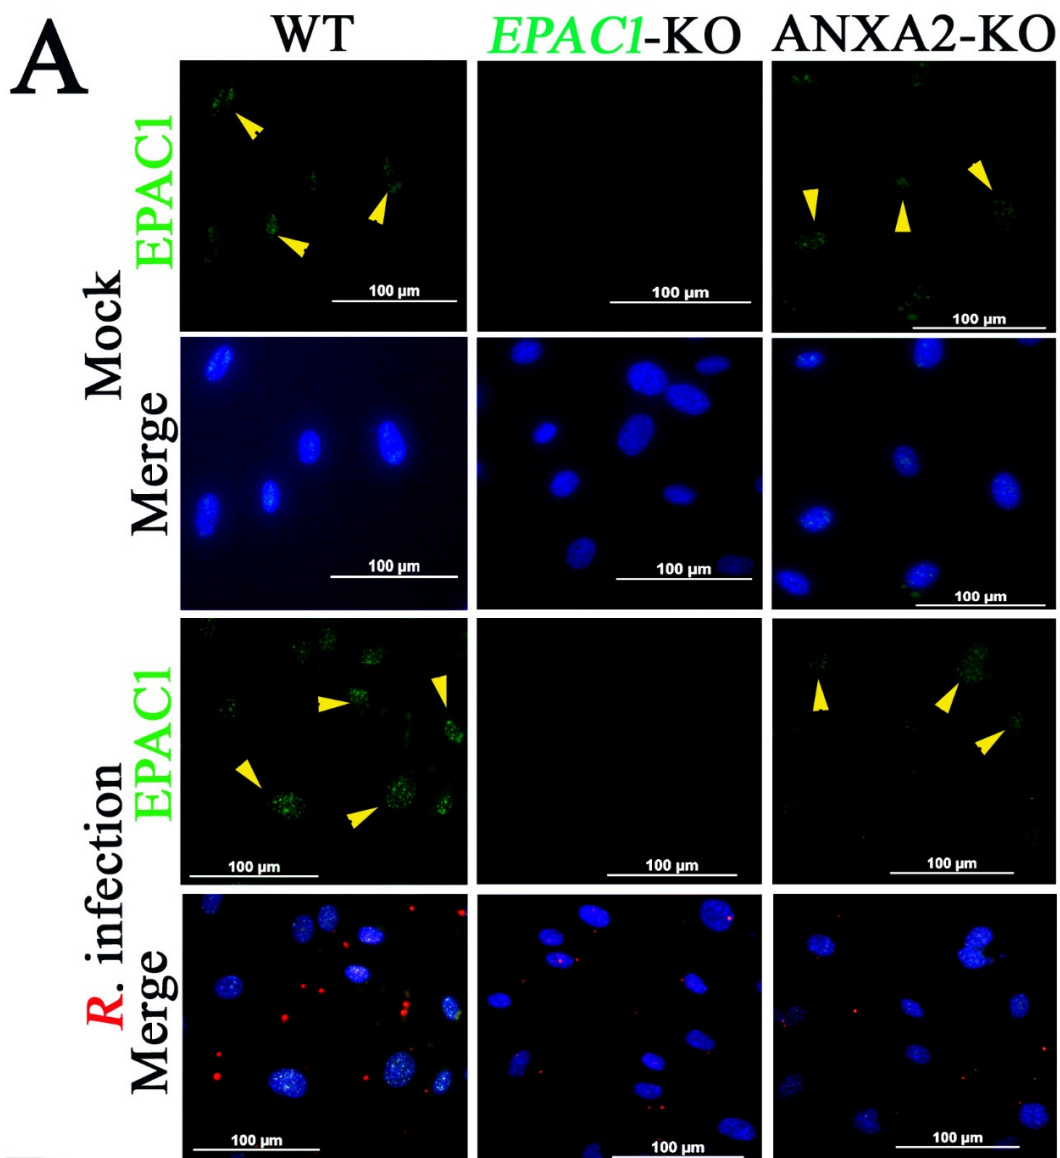

**B**

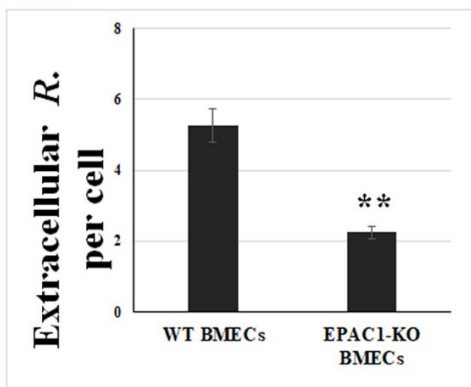

**C**

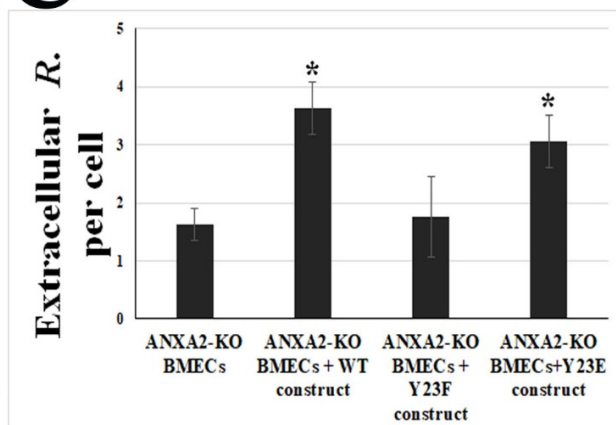

**Figure S1:** (A) Representative dual-target IF staining of rickettsiae (*R.*) (red) and EPAC1 (green) in mouse WT, *EPAC1*-KO, and *ANXA2*-KO BMECs 15 min post-infection (p.i.) using *R. australis* at a MOI of 10. Nuclei of BMECs were counterstained with DAPI (blue). The signals of EPAC1 are visualized (arrow heads) mainly in the nuclei. Scale bars: 100  $\mu$ m. (B) Extracellular adhesive bacteria in WT and *EPAC1*-KO BMECs were enumerated by IF microscopy at 15 minutes p.i. using *R. australis* at a MOI of 10. Samples were blinded to the researcher doing the counting to avoid bias. All ECs were fixed with 4% paraformaldehyde as impermeable fixation for IF microscopy.  $n = 5$  for all groups. \*\*, compared to the WT group,  $p < 0.01$ . (C) Extracellular adhesive bacteria in WT and *ANXA2*-KO BMECs, which were transfected with different ANXA2 constructs, were enumerated by IF microscopy at 15 minutes p.i. using *R. australis* at a MOI of 10. All ECs were fixed with 4% paraformaldehyde as impermeable fixation for IF microscopy.  $n = 5$  for all groups. Data are represented as mean  $\pm$  SEM. \*, compared to *ANXA2*-KO BMECs,  $p < 0.05$ .

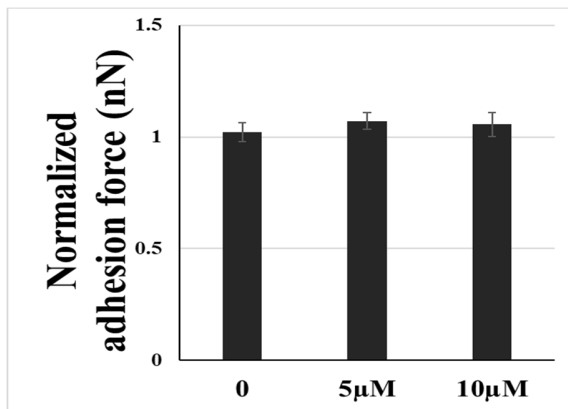

**Figure S2:** FluidFM studies measuring the binding forces (nanoNewton, nN) between a reOmpB-coated microbead and single living *ANXA2*-KO mouse BMEC, which was exposed to I942 at 0, 5, or 10  $\mu$ M for 24 h. Data are represented as mean  $\pm$  SEM. At least three different detection areas were measured in one cell. Ten cells per group were sampled.

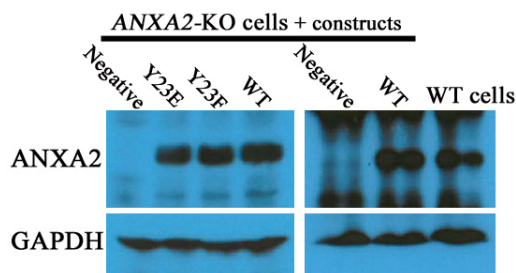

**Figure S3:** Expression of ANXA2 was examined using Western immunoblotting in mouse BMECs.

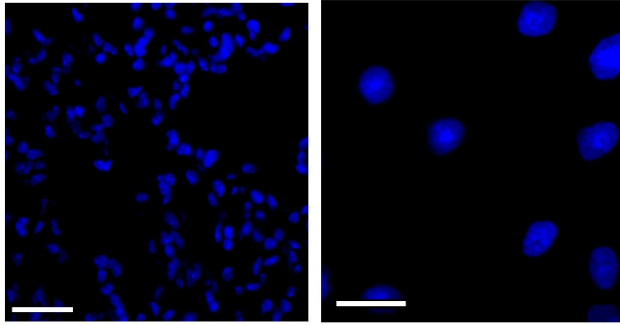

**Figure S4:** Normal rabbit and mouse IgGs were used as reagent controls during the IF assay for tissues (left) and BMECs (right). Nuclei were stained with DAPI. Scale bars: 50  $\mu\text{m}$ .
